# Supplementary material for: Predictive model for prolonged length of hospital stay in patients with osteoporotic femoral neck fracture: A 5-year retrospective study
Source: Front Med (Lausanne). 2023 Jan 11;9:1106312. doi: 10.3389/fmed.2022.1106312 (PMC9874094; doi:10.3389/fmed.2022.1106312)
Supplement: Supplementary Appendix 1 — Calculator application of the predicted odds ratio and probability of prolonged LOS following osteoporotic femoral neck fracture. [file Table_1.XLSX]

## Sheet: Sheet1
Coefficient	Variable	Coding	Input
1.24655	Arthroplasty	1=yes,0=no	0		0
0.0422503	Age	(years)	88	Age1	12.3543
0.640737	ASA score class 3 or 4	1=yes,0=no	1		1
10.2168	Time from injury to surgery	(days)	12	time(x)	0.13
				time1	0.000437037
0.103691	BMI	kg/m2	22.4913
				BMI	1.2008
	linear predictor	0.618283
	Odd ratio of prolonged length of stay	1.85574
	probability of prolonged length of stay	0.649828
